# Supplementary material for: Schiff base-functionalized silatrane-based receptor as a potential chemo-sensor for the detection of Al3+ ions
Source: Royal Society of Chemistry journal article supplement (doi:10.1039/d1nj00943e), 2021-01-01
Supplement: d1nj00943e1.pdf [file d1nj00943e1.pdf]

## Schiff base functionalized silatrane based receptor as potential Chemo-sensor for detection of Al<sup>3+</sup> ions

Gurjaspreet Singh<sup>a\*</sup>, Priyanka<sup>a</sup>, Akshpreet Singh<sup>b</sup> Pinky Satija<sup>a</sup>, Sushma<sup>a</sup>, Pawan<sup>a</sup>, Mohit<sup>a</sup>,  
Jandeep Singh<sup>c</sup>, Jasbhinder Singh<sup>c</sup>

<sup>a</sup>Department of Chemistry, Panjab University, Chandigarh, 160014, India

<sup>b</sup>Department of Chemistry, GGSDS College, Sector-32C, Chandigarh, India

<sup>c</sup>Department of Chemistry, Lovely Professional University, Phagwara, Punjab, India

\*Corresponding Authors

Prof. Gurjaspreet Singh

Department of Chemistry & Centre of Advanced Studies

Panjab University, Chandigarh, India

Email: [gjsingh@pu.ac.in](mailto:gjsingh@pu.ac.in)

| Entry                                                | Page No. |
|------------------------------------------------------|----------|
| <sup>1</sup> H NMR spectrum of compound 3a (Fig.S1)  | 3        |
| <sup>1</sup> H NMR spectrum of compound 3b (Fig.S2)  | 3        |
| <sup>1</sup> H NMR spectrum of compound 4a(Fig.S3)   | 4        |
| <sup>1</sup> H NMR spectrum of compound 4b (Fig.S4)  | 4        |
| <sup>13</sup> C NMR spectrum of compound 3a (Fig.S5) | 5        |
| <sup>13</sup> C NMR spectrum of compound 3b (Fig.S6) | 5        |
| <sup>13</sup> C NMR spectrum of compound 4a (Fig.S7) | 6        |
| <sup>13</sup> C NMR spectrum of compound 4b (Fig.S8) | 6        |
| IR spectrum of compound 3a (Fig.S9)                  | 7        |
| IR spectrum of compound 3b (Fig.S10)                 | 7        |
| IR spectrum of compound 4a (Fig.S11)                 | 8        |
| IR spectrum of compound 4b (Fig.S12)                 | 8        |
| Mass spectrum of compound 3a (Fig.S13)               | 9        |
| Mass spectrum of compound 3b (Fig.S14)               | 9        |

|                                                       |    |
|-------------------------------------------------------|----|
| Mass spectrum of compound 4a (Fig.S15)                | 10 |
| Mass spectrum of compound 4b (Fig.S16)                | 10 |
| TGA of compound 3(a-b)& 4(a-b) (Fig.S17)              | 11 |
| <sup>1</sup> H NMR spectrum of 4b-Al complex(Fig.S18) | 11 |

3a

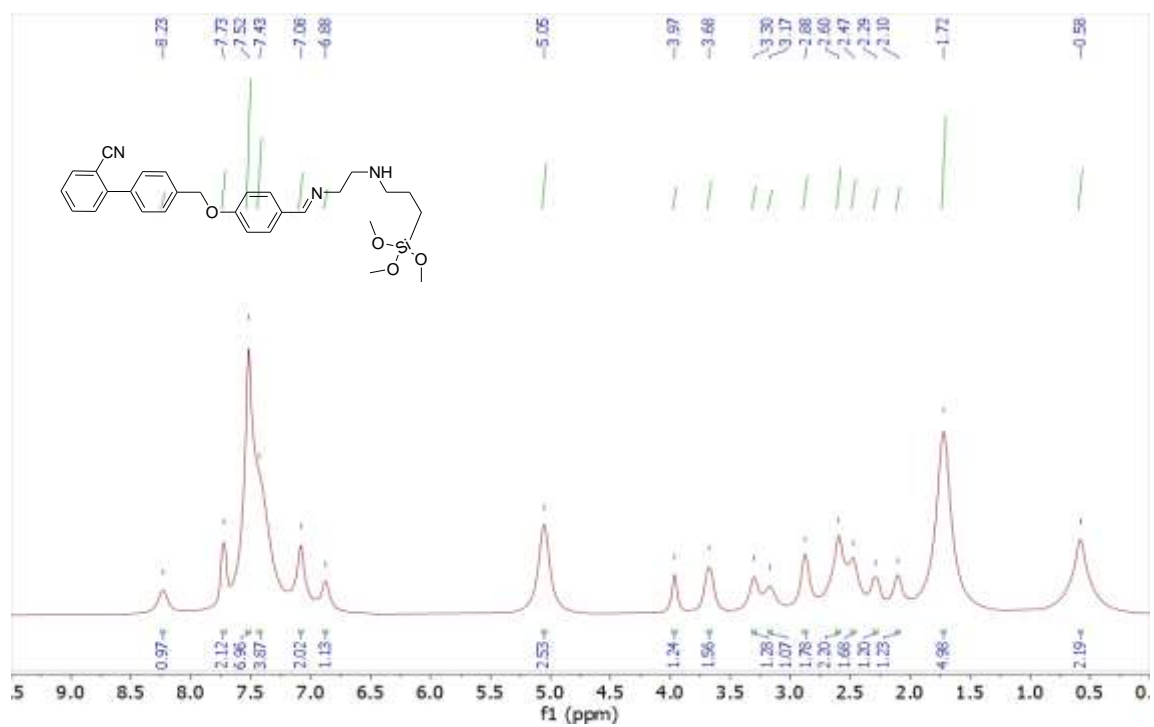

(Fig.S1) <sup>1</sup>H NMR spectrum of compound 3a

3b

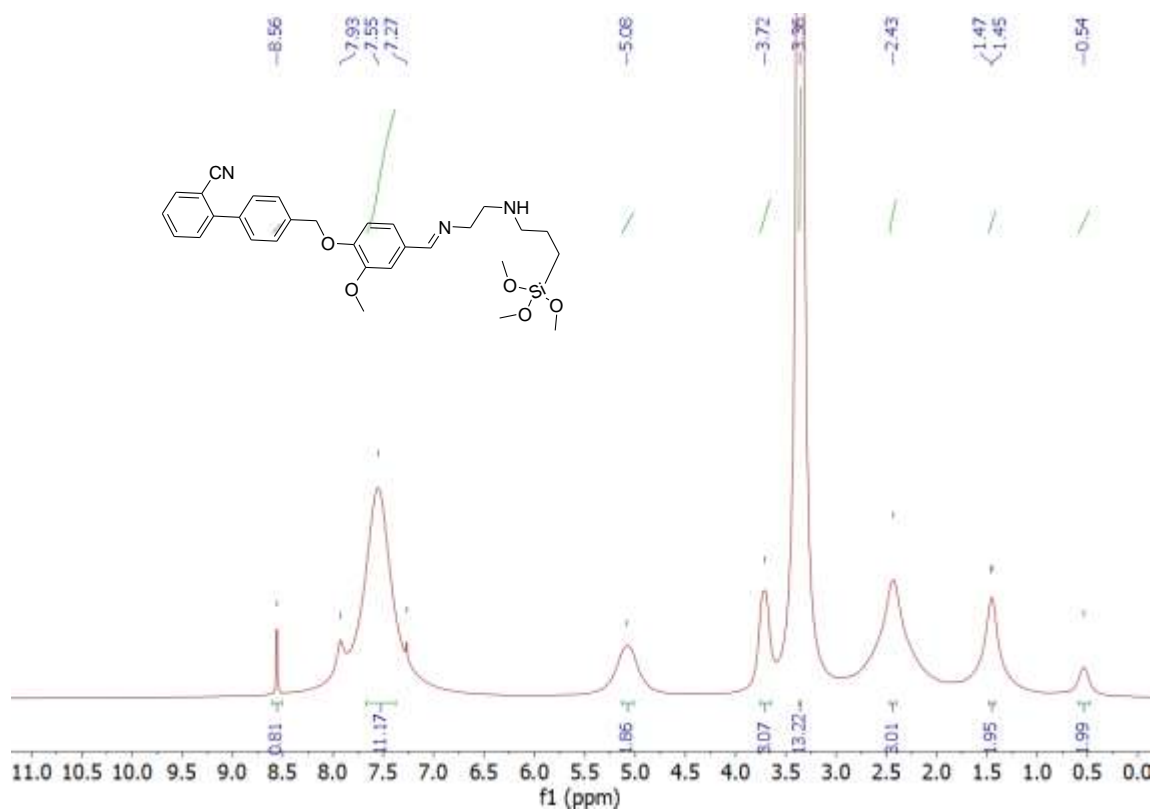

(Fig.S2) <sup>1</sup>H NMR spectrum of compound 3b

4a

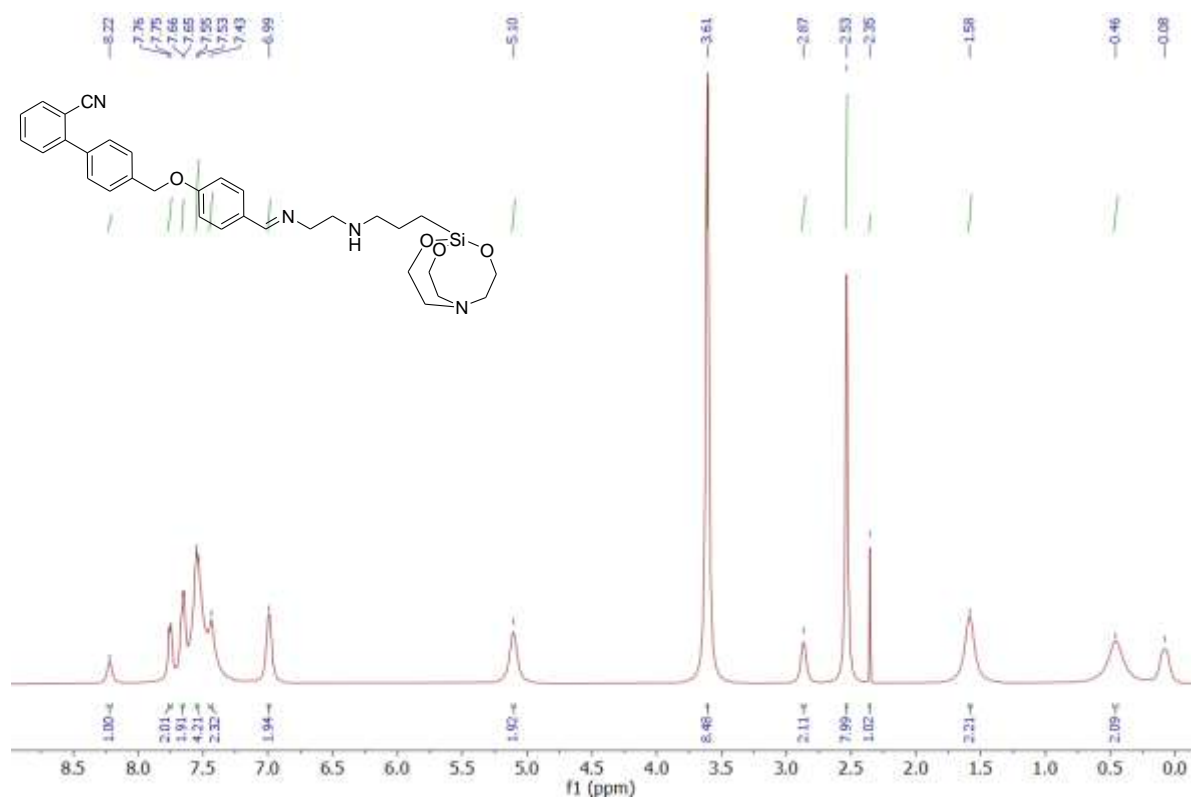

(Fig.S3) <sup>1</sup>H NMR spectrum of compound 4a

4b

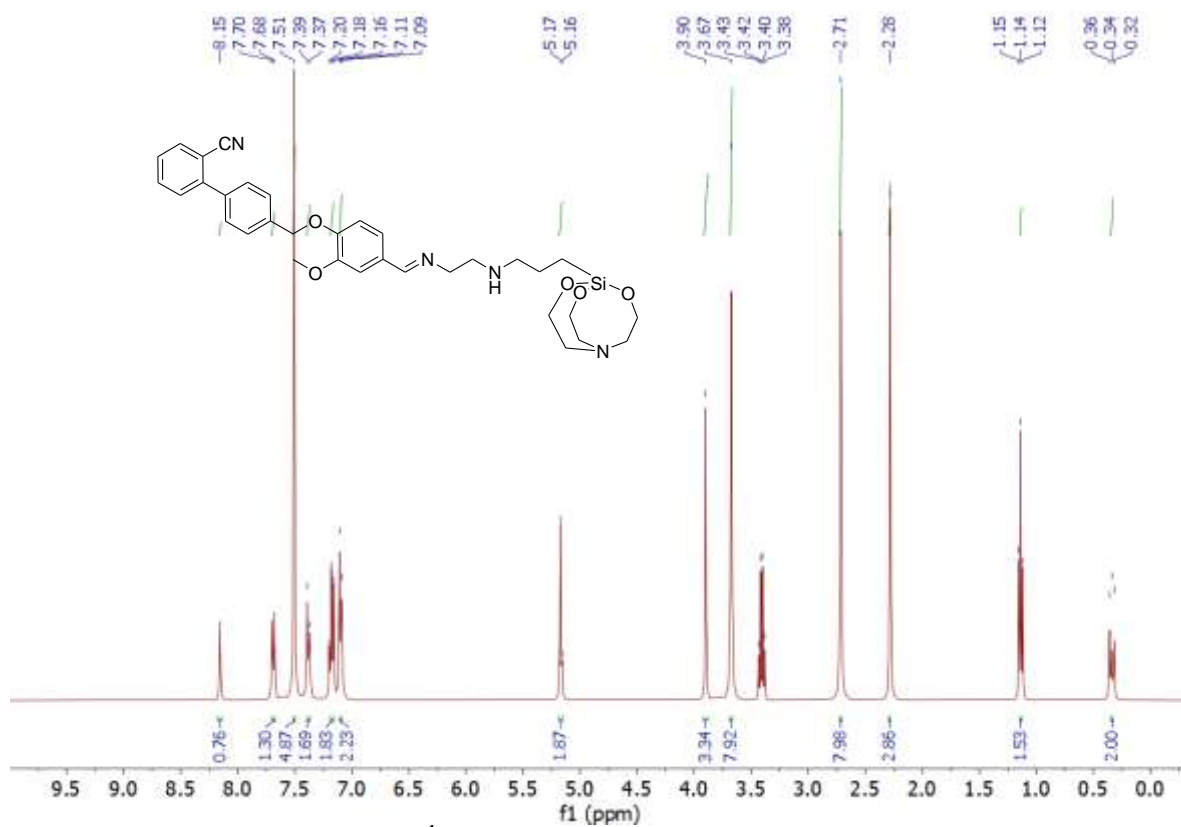

(Fig.S4) <sup>1</sup>H NMR spectrum of compound 4b

3a

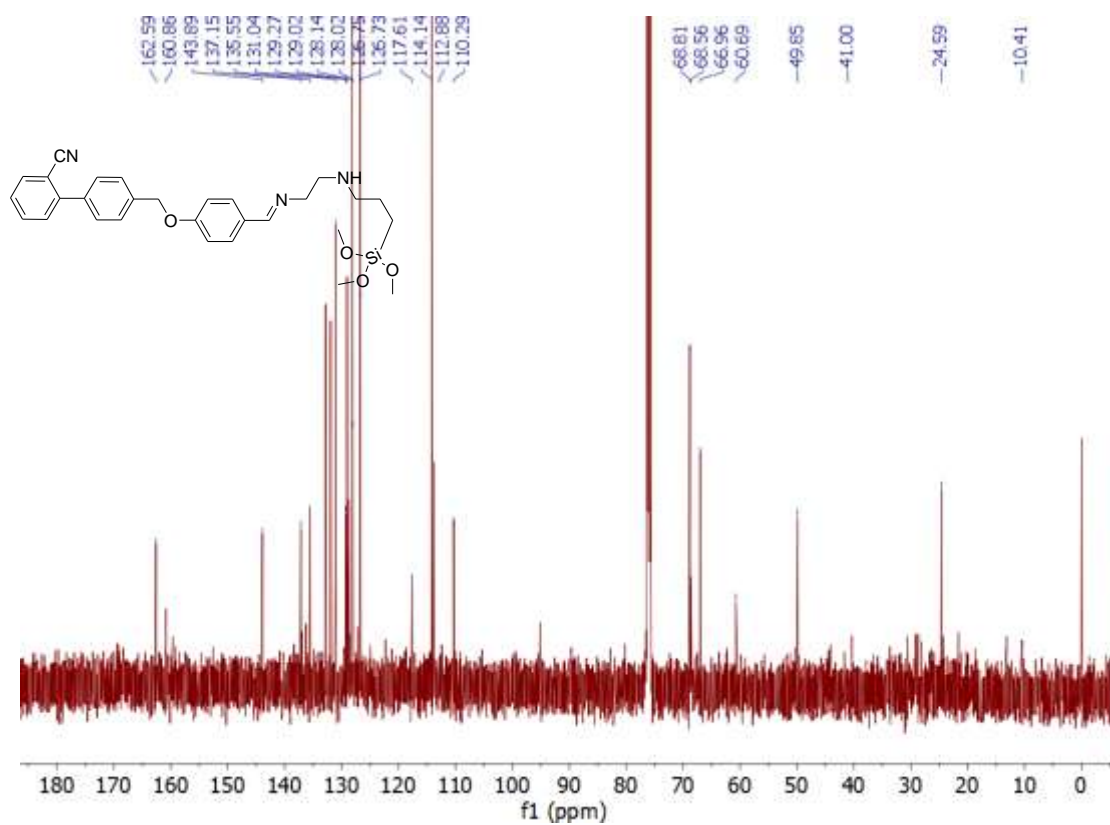

(Fig.S5) <sup>13</sup>C NMR spectrum of compound 3a

3b

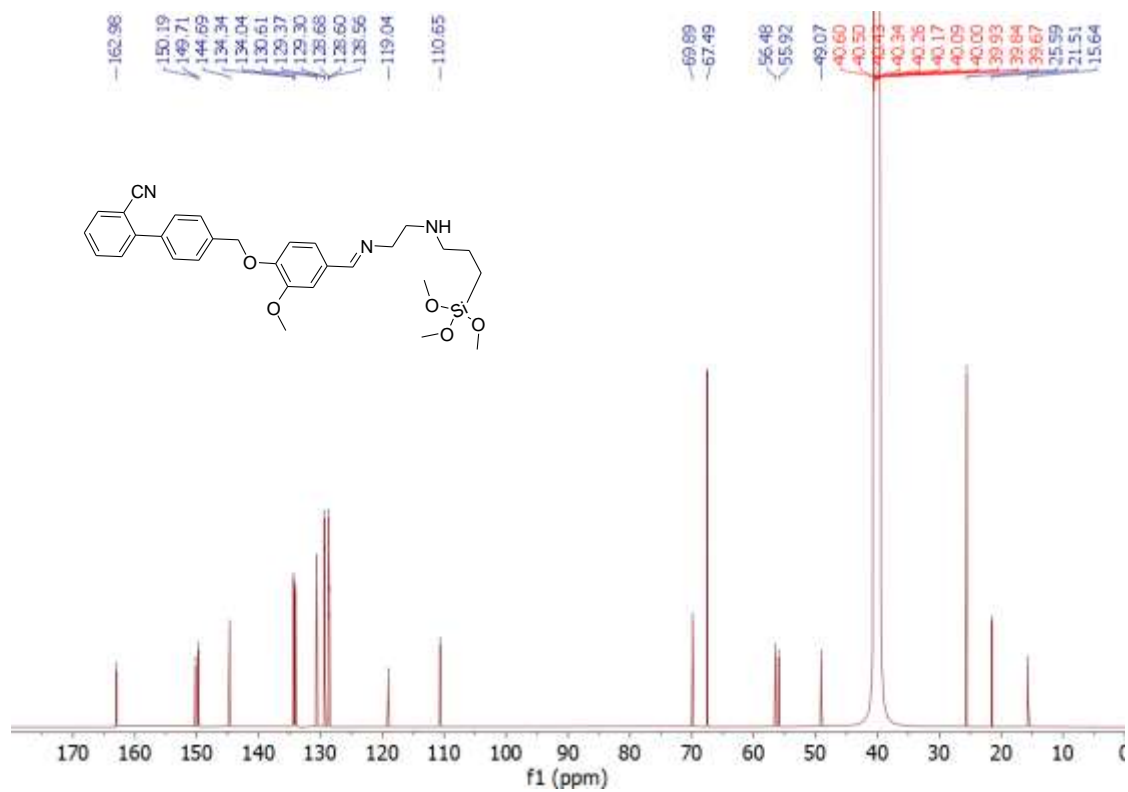

(Fig.S6) <sup>13</sup>C NMR spectrum of compound 3b



3a

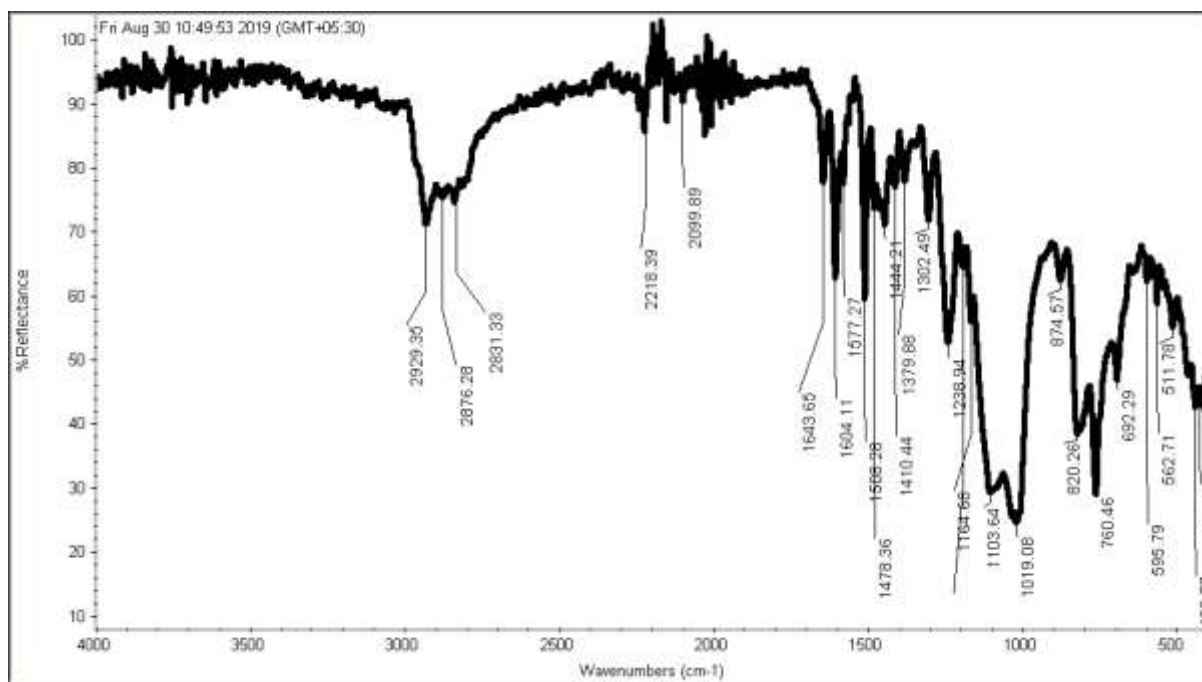

(Fig.S9) IR spectrum of compound 3a

3b

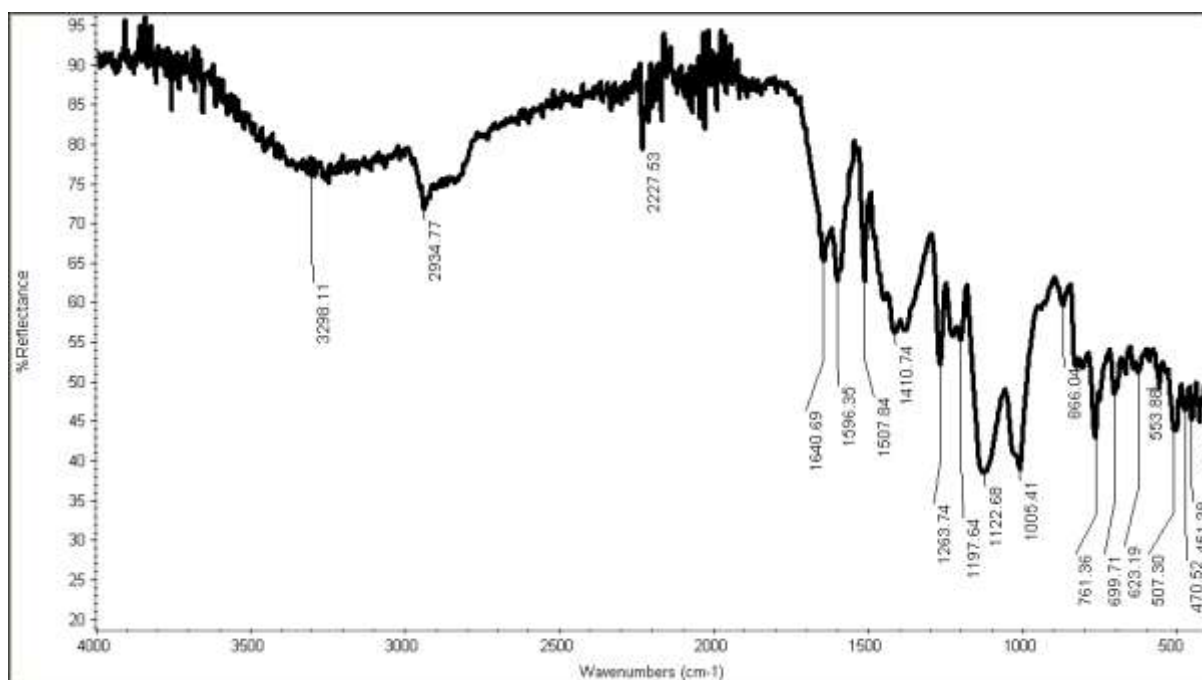

(Fig.S10) IR spectrum of compound 3b

4a

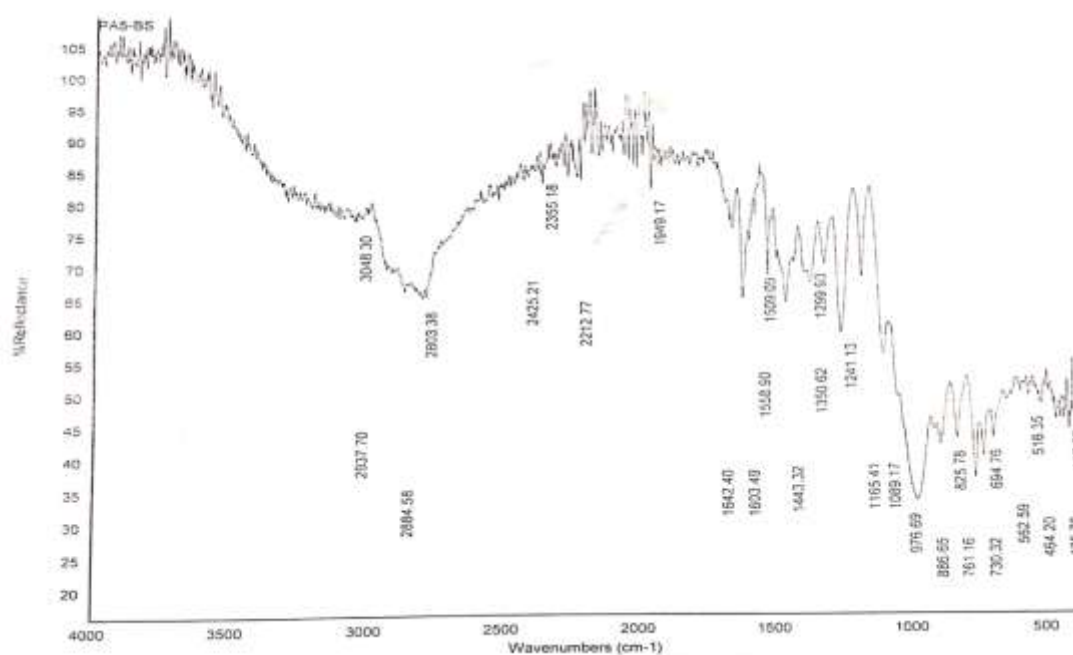

(Fig.S11) IR spectrum of compound 4a

4b

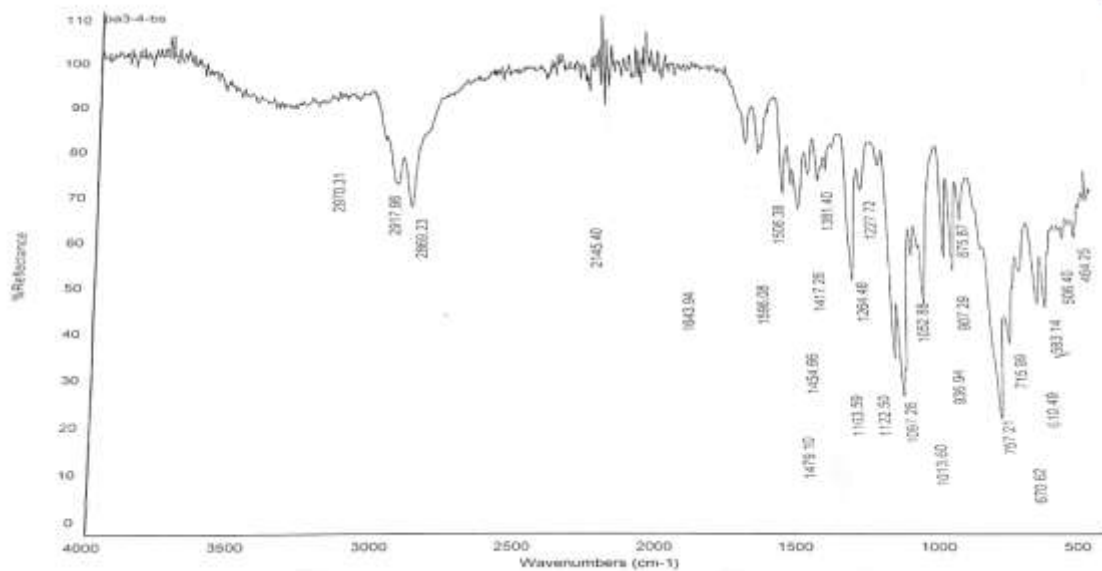

(Fig.S12) IR spectrum of compound 4b



3a

WATERS,Q-TOF MICROMASS (ESI-MS)  
PRIYANKA PA3-5B 7 (0.131) Cm (4:14-19:43)

SAIF/CIL,PANJAB UNIVERSITY,CHANDIGARH  
TOF MS ES+  
1.20e3

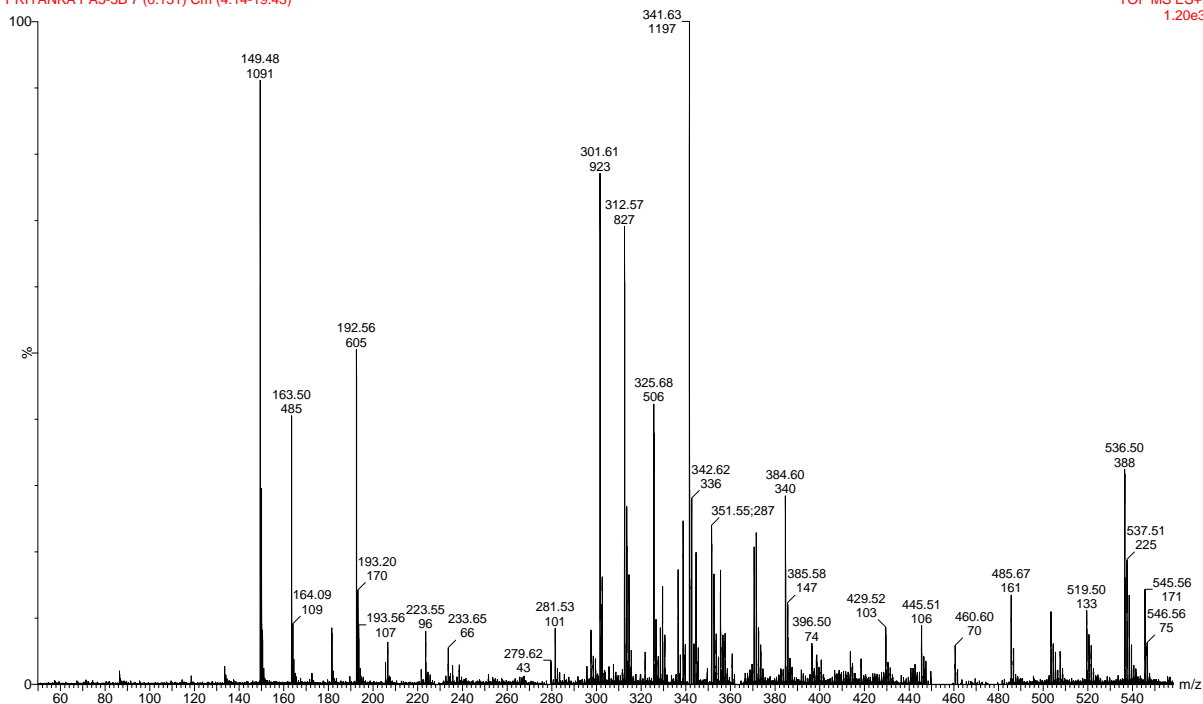

(Fig.S13) Mass spectrum of compound 3a

3b

WATERS,Q-TOF MICROMASS (ESI-MS)  
PRIYANKA PA3-4B 6 (0.159) Cm (4:8-11:18)

SAIF/CIL,PANJAB UNIVERSITY,CHANDIGARH  
TOF MS ES+  
1.30e3

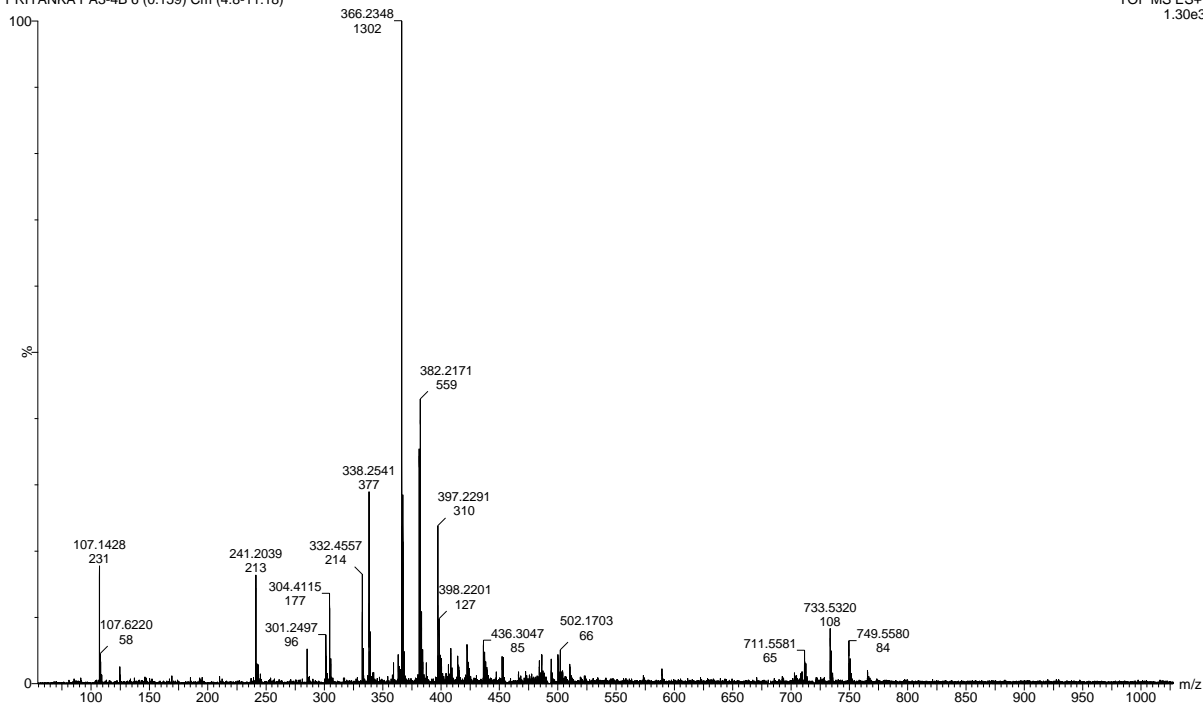

(Fig.S14) Mass spectrum of compound 3b

4a

WATERS,Q-TOF MICROMASS (ESI-MS)  
PRIYANKA PA3-5BS 6 (0.112) Cm (3:17-18:35)

SAIF/CIL,PANJAB UNIVERSITY,CHANDIGARH  
TOF MS ES+  
1.26e4

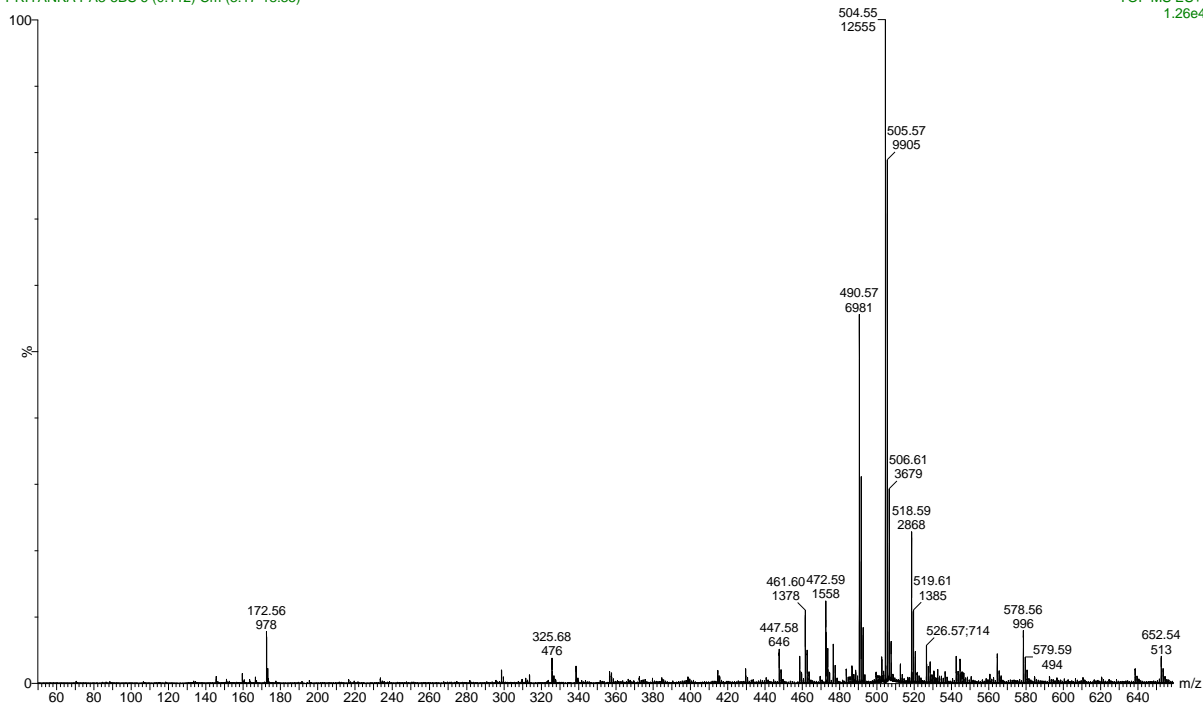

(Fig.S15) Mass spectrum of compound 4a

4b

WATERS,Q-TOF MICROMASS (ESI-MS)  
PRIYANKA PA3-4BS 4 (0.106) Cm (3:21-27:41)

SAIF/CIL,PANJAB UNIVERSITY,CHANDIGARH  
TOF MS ES+  
1.06e4

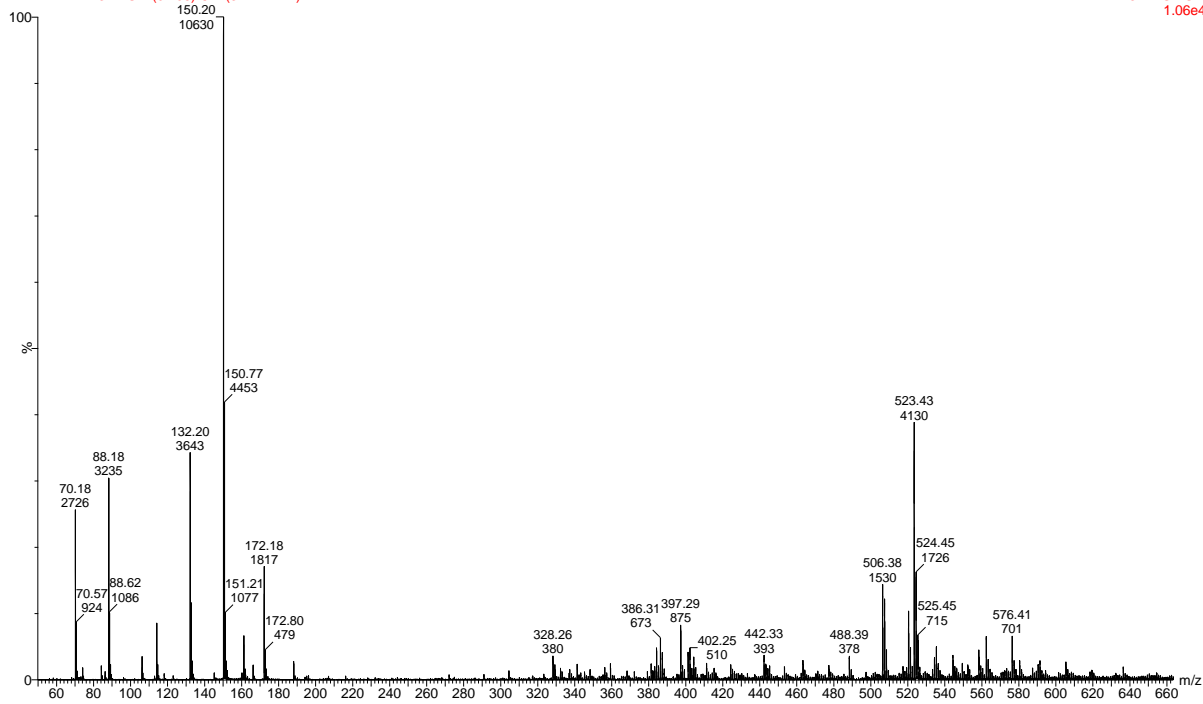

(Fig.S16) Mass spectrum of compound 4b

3(a-b) and 4(a-b)

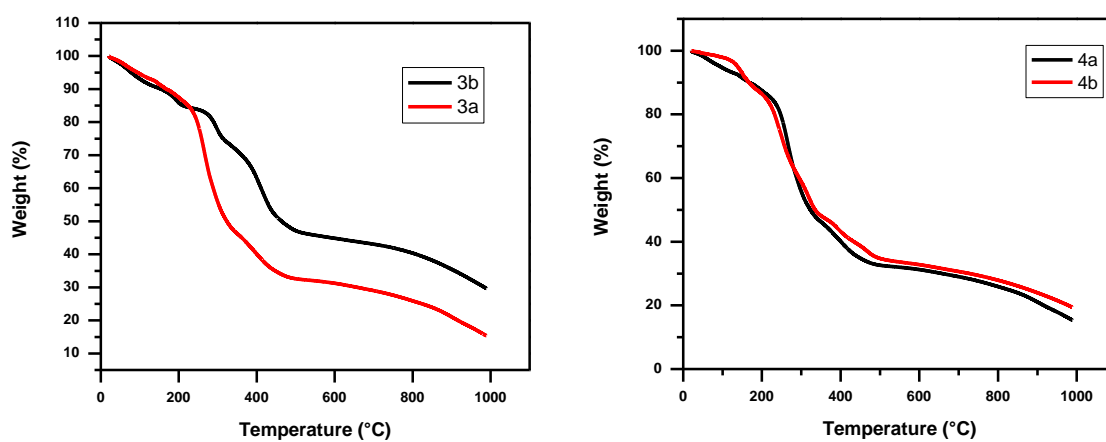

(Fig.S17) TGA of compounds 3(a-b) and 4(a-b)

4b-Al<sup>3+</sup> complex

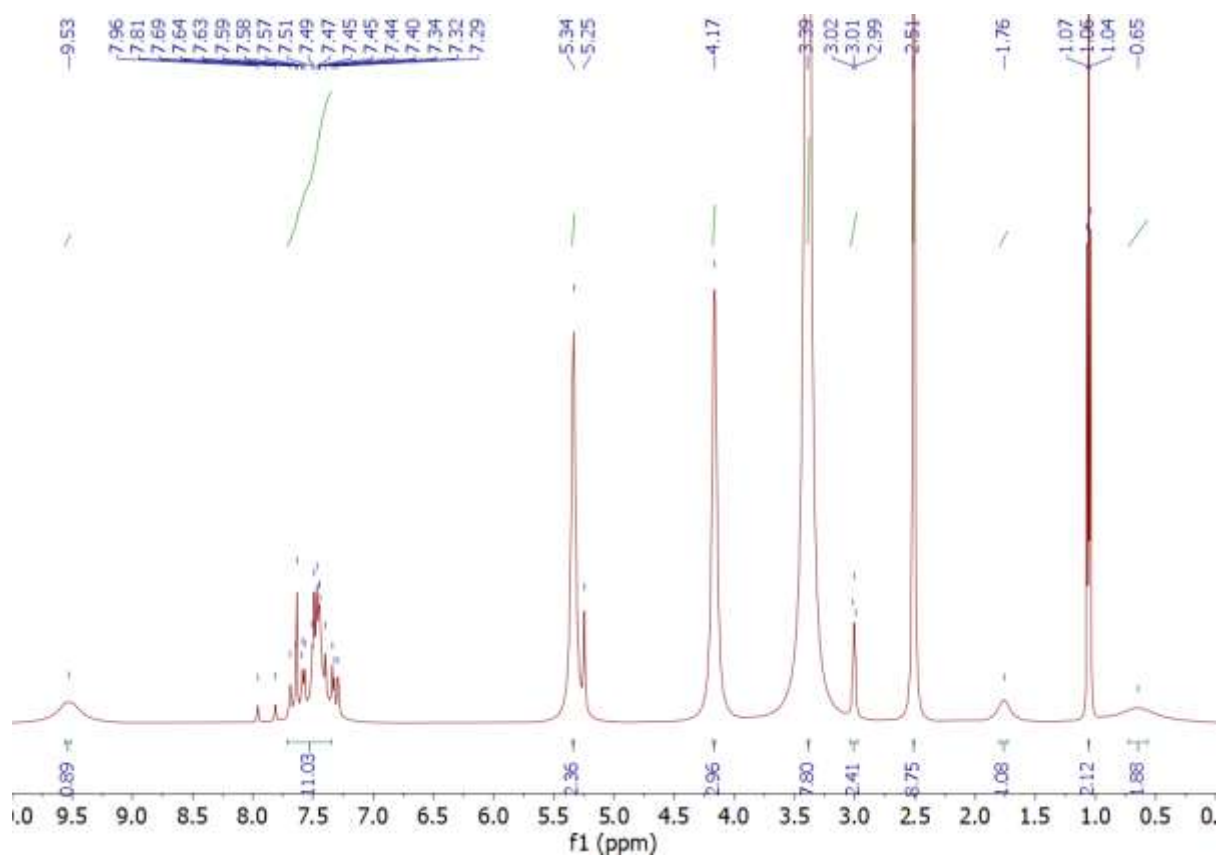

(Fig.S18) <sup>1</sup>H NMR spectrum of compound 4b-Al<sup>3+</sup> complex
